# Supplementary material for: Sampling Volcanic Plume Using a Drone-Borne SelPS for Remotely Determined Stable Isotopic Compositions of Fumarolic Carbon Dioxide
Source: Frontiers journal article supplement (doi:10.3389/feart.2022.833733), 2022-03-28
Supplement: Image_1.pdf [file Image_1.pdf]

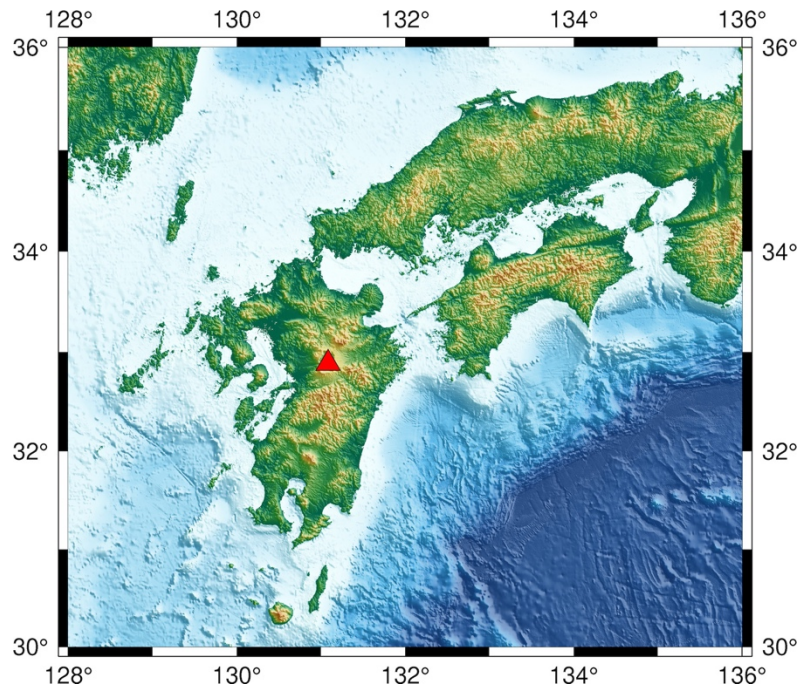

Supplementary Figure 1 (Figure S1) Location of Aso volcano (red triangle) in the western part of Japan.
